# Supplementary material
Source: publisher figshare collection journal article supplement (https://wiley.figshare.com/articles/dataset/_/3567792)
Supplement: Supplementary file 2 [file 1 › appendix-B.htm]

Ecological Archives M081-018-A2


### *Ecological Archives* M081-018-A2

### Anthony R. Ives and Matthew R. Helmus. 2011. Generalized linear mixed models for phylogenetic analyses of community structure. *Ecological Monographs* 81:511–525.

Appendix B. Statistical estimation and
validation of phylogenetic generalized linear mixed models, PGLMMs.

> View / download PDF.

---


[Back to M081-018]
